# Supplementary material for: Destruction of per/poly-fluorinated alkyl substances by magnetite nanoparticle-catalyzed UV-Fenton reaction
Source: Royal Society of Chemistry journal article supplement (doi:10.1039/d2ew00058j), 2022-01-01
Supplement: d2ew00058j1.pdf [file d2ew00058j1.pdf]

1 **Supporting Information for**

2

3 **Destruction of Per/poly-fluorinated Alkyl Substances by Magnetite**  
4 **Nanoparticle-Catalyzed UV-Fenton reaction**

5 *Danielle. R. Schlesinger, Collin McDermott, Nam Q. Le, Jesse S. Ko, James K. Johnson, Plamen*

6 *A. Demirev, Zhiyong Xia\**

7 The Johns Hopkins University Applied Physics Laboratory, Laurel, MD 20723, USA

8 \*Corresponding author: [zhiyong.xia@jhuapl.edu](mailto:zhiyong.xia@jhuapl.edu)

9

10 **This file includes the following content:**

11 **S1. High Resolution Mass Spectrometry (HRMS) Experimental Details.**

12 **S2. XANES Experimental Details.**

13 **S3. Results of HRMS, Fluorescence Probe and XANES Analyses.**

14 **Supplementary Figures SF1 – SF5.**

15 **Supplementary Tables ST1 – ST2.**

16 **Supplementary References**

17

18

19

20

21

22

23

24 **ST1.** Percent destruction of PFOA and PFOS with variable UV exposure time, hydrogen peroxide  
 25 (H<sub>2</sub>O<sub>2</sub>) concentration, and Fe<sub>3</sub>O<sub>4</sub> concentration.

| UV time (min) | H <sub>2</sub> O <sub>2</sub> conc. (M) | Fe <sub>3</sub> O <sub>4</sub> conc. (ppm) | % Destruction PFOA <sup>a</sup> | % Destruction PFOS <sup>a</sup> |
|---------------|-----------------------------------------|--------------------------------------------|---------------------------------|---------------------------------|
| 5             | 0.10                                    | 100                                        | 13.3                            | 20.0                            |
| 5             | 2.55                                    | 100                                        | 26.7                            | 38.7                            |
| 5             | 2.55                                    | 1050                                       | 68.0                            | 88.0                            |
| 5             | 2.55                                    | 2000                                       | 66.7                            | 84.7                            |
| 5             | 5.00                                    | 1050                                       | 56.0                            | 75.3                            |
| 5             | 5.00                                    | 2000                                       | 68.7                            | 83.3                            |
| 32.5          | 0.10                                    | 1050                                       | 6.7                             | 36.0                            |
| 32.5          | 0.10                                    | 2000                                       | 0.0                             | 33.3                            |
| 32.5          | 2.55                                    | 100                                        | 67.3                            | 76.0                            |
| 32.5          | 2.55                                    | 1050                                       | 61.3                            | 86.0                            |
| 32.5          | 2.55                                    | 2000                                       | 66.0                            | 80.7                            |
| 32.5          | 5.00                                    | 100                                        | 74.7                            | 74.0                            |
| 32.5          | 5.00                                    | 2000                                       | 69.3                            | 82.7                            |
| 60            | 0.10                                    | 1050                                       | 0.0                             | 33.3                            |
| 60            | 0.10                                    | 2000                                       | 6.7                             | 34.0                            |
| 60            | 2.55                                    | 100                                        | 65.3                            | 78.7                            |
| 60            | 2.55                                    | 2000                                       | 63.3                            | 74.0                            |
| 60            | 5.00                                    | 100                                        | 39.3                            | 64.7                            |
| 60            | 5.00                                    | 1050                                       | 13.3                            | 47.3                            |
| 60            | 5.00                                    | 2000                                       | 54.0                            | 72.7                            |

26 <sup>a</sup> Percent error for samples was calculated to be ±7.0% for PFOA and ±4.9% for PFOS.

27

28 **S1. High Resolution Mass Spectrometry (HRMS) Experimental Details.**

29 HRMS analysis was conducted on a Thermo Scientific Orbitrap Exploris 240 instrument. Control  
 30 PFOA and PFOS samples (100 ppm) and samples after reaction at specific conditions (pH 7 or pH  
 31 9, 2.5M or 5M) were analyzed under the same instrumental conditions. Samples were prepared by  
 32 filtration through 0.2 μm PTFE syringe filters followed by dilution in methanol in a 1:10 ratio of  
 33 sample to methanol. Sample solutions were introduced by continuous direct infusion (10 μl/min)

34 into the electrospray ion source of the instrument and were analyzed in both negative and positive  
35 ion modes. Optimized source conditions were 3600V and 2600V spray voltage for positive and  
36 negative ion generation, respectively. The instrument was autotuned (rf lens rel. value 70%) with  
37 automatic gain control and custom injection time functions switched on. The system was mass  
38 calibrated in both polarities each day before each analysis by following the manufacturer's  
39 protocols with calibration compound mixtures purchased from the manufacturer. The resolving  
40 power was set at 240,000 FWHM. For each analyzed sample, 150 individual ion spectra were  
41 collected in a range from 50 to 500 m/z (50 to 700 m/z for PFOS) in MS or tandem MS mode for  
42 either polarity, respectively. The estimated experimental mass accuracy was better than 5 ppm in  
43 the entire range. Tandem mass spectrometry was performed by isolating monoisotopic precursor  
44 ions (window 1 m/z) and subsequent manual optimization of the relative collision energy value for  
45 efficient collision-induced dissociation (CID). Elemental composition assignments from accurate  
46 mass determination of select ions in the averaged negative ion spectra were performed using the  
47 Web-based software Chem Calc (<https://www.chemcalc.org/mf-finder>). The mass of a single  
48 electron (0.00054 Da) was subtracted from each experimentally determined anion mass, i.e., the  
49 mass of the neutral species was input into the program. The calculated masses of the species with  
50 tentative elemental composition assignment were restricted to be less than 5 ppm than the  
51 measured neutral species mass.

## 52 **S2. XANES Experimental Details.**

53 Fe<sub>3</sub>O<sub>4</sub> nanoparticles were filtered from solutions following Fenton reactions in the UV oven and  
54 collected on P5 grade filter paper. A section of filter paper approximately 1 cm × 2 cm with a  
55 uniform layer of magnetite was cut from the whole filter paper. The filtered Fe<sub>3</sub>O<sub>4</sub> section was  
56 mounted between Kapton tape and X-ray clean polyfilm. Fe XANES were collected for each

57 sample from -100 to -20 eV below the Fe k-edge (5.0 eV step size), from -20 eV below to 50 eV  
58 above the Fe k-edge (0.2 eV step size), and 50 eV to 150 eV above the Fe k-edge (5.0 eV step size)  
59 with a 0.5 sec point<sup>-1</sup> acquisition time. Spectra were collected in both transmission and  
60 fluorescence modes, and a standard ionization chamber and a four element Silicon drift detector  
61 were used for each of these measurement types, respectively. Fe XANES standard spectra of  
62 Fe<sub>3</sub>O<sub>4</sub>, Fe foil, hematite (Fe<sub>2</sub>O<sub>3</sub>), and wustite (FeO) were collected and used to calibrate all samples  
63 to the same Fe K-edge energy and to conduct linear combination fitting of each spectrum.

### 64 **S3. Results of HRMS and XANES Analyses.**

#### 65 **S3.1. HRMS.**

66 High resolution negative ion mass spectra of PFOS control and PFOS reacted under varying  
67 conditions are plotted on Figure SF1. For the control, the most intense ion peak corresponds to  
68 intact PFOS anion [C<sub>8</sub>F<sub>17</sub>O<sub>3</sub>S]<sup>-</sup> at m/z 498.93015 (molecular ion). The absolute intensity of the  
69 intact PFOS peak in spectra from reacted samples is decreasing considerably. Similar to PFOA,  
70 the initial PFOS sample has been completely degraded at 5M H<sub>2</sub>O<sub>2</sub> and pH9, and no molecular ion  
71 is observed in the spectrum (Figure SF2.C). Additional peaks observed in spectra from reacted  
72 PFOA and PFOS are interpreted as the respective degradation products (Supplementary Tables ST2  
73 and ST3).

74

75

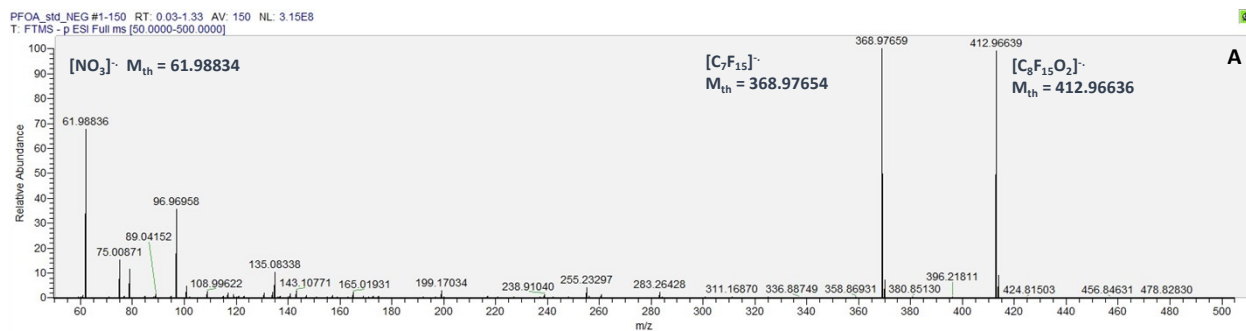

76

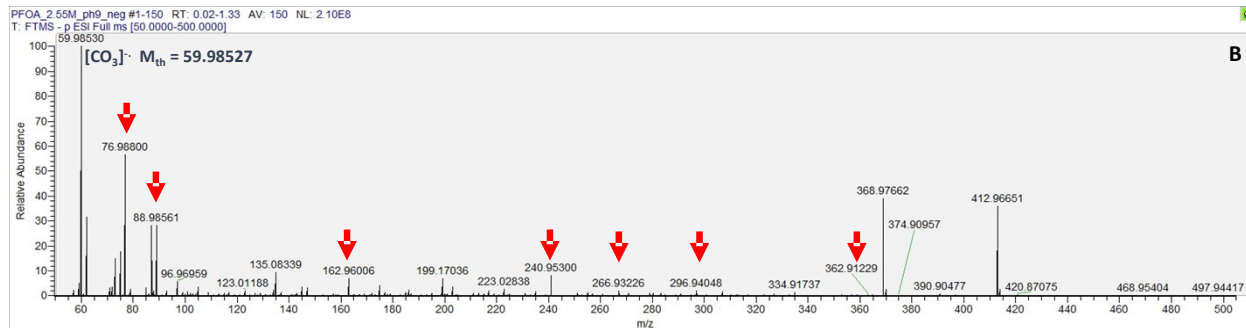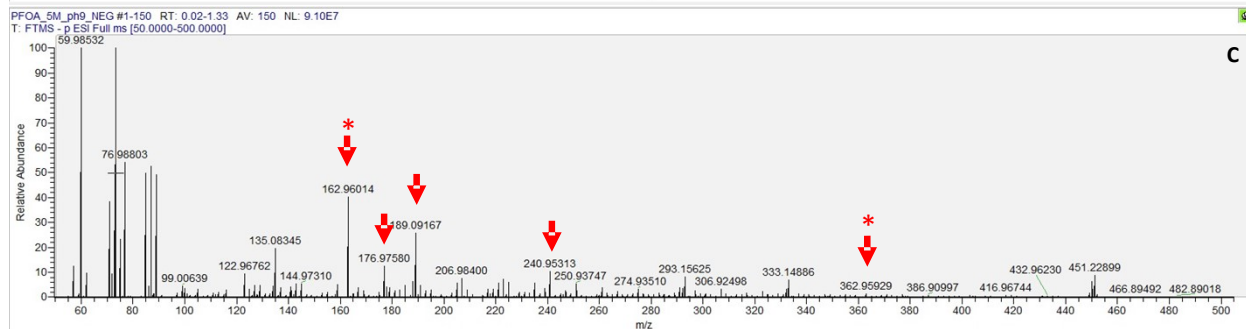

77

78 **Figure SF1.** Comparison between negative ion spectra of PFOA control (A) and PFOA reacted at  
 79 different conditions: 2.55M H<sub>2</sub>O<sub>2</sub> at pH9 (B), and 5M H<sub>2</sub>O<sub>2</sub> at pH9 (C). Arrows indicate peaks  
 80 corresponding to degradation products, asterisks indicate peaks reported in the literature.  
 81

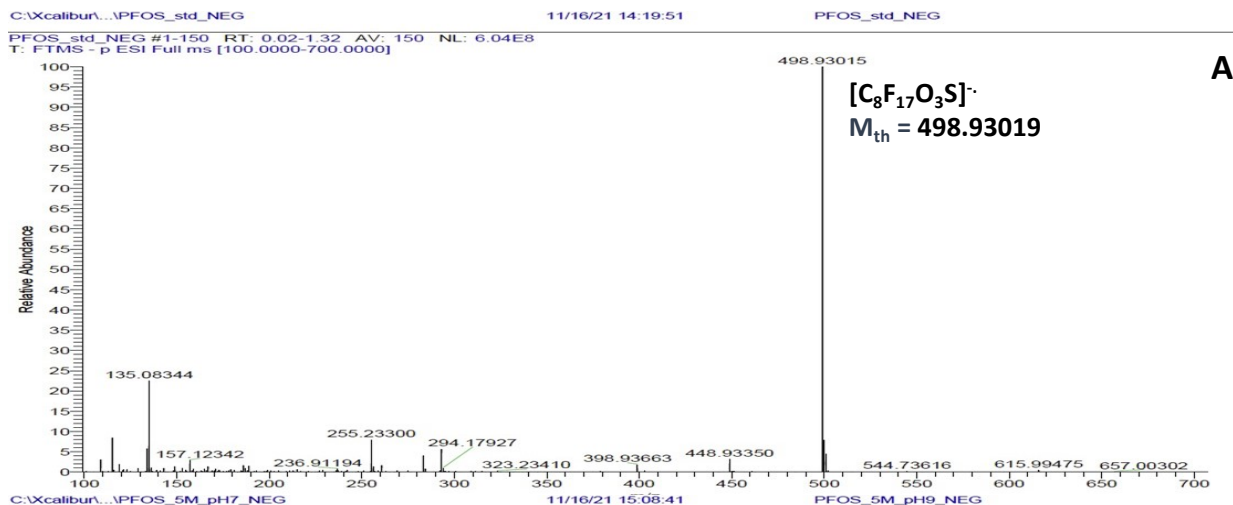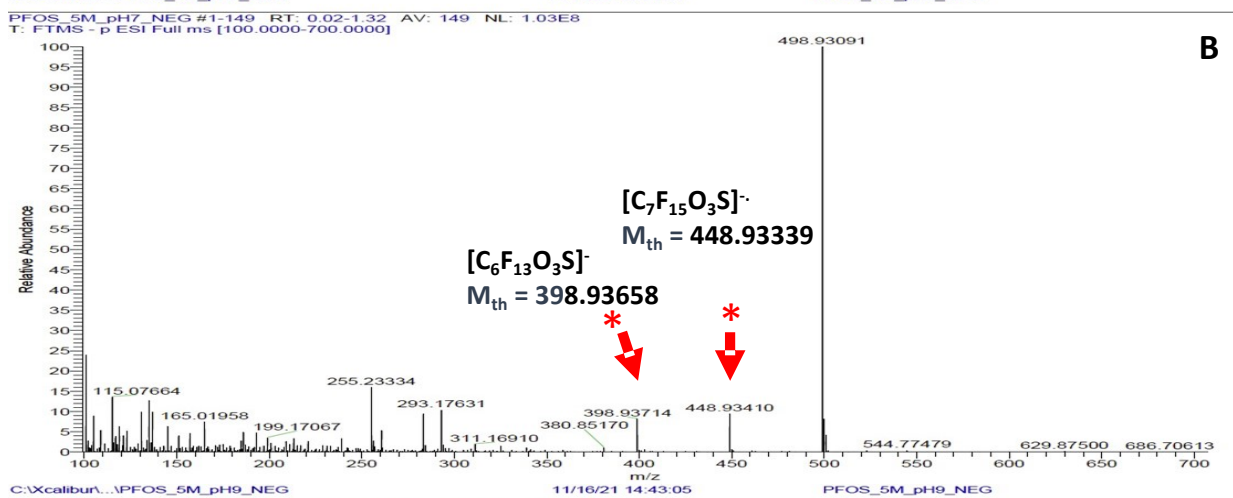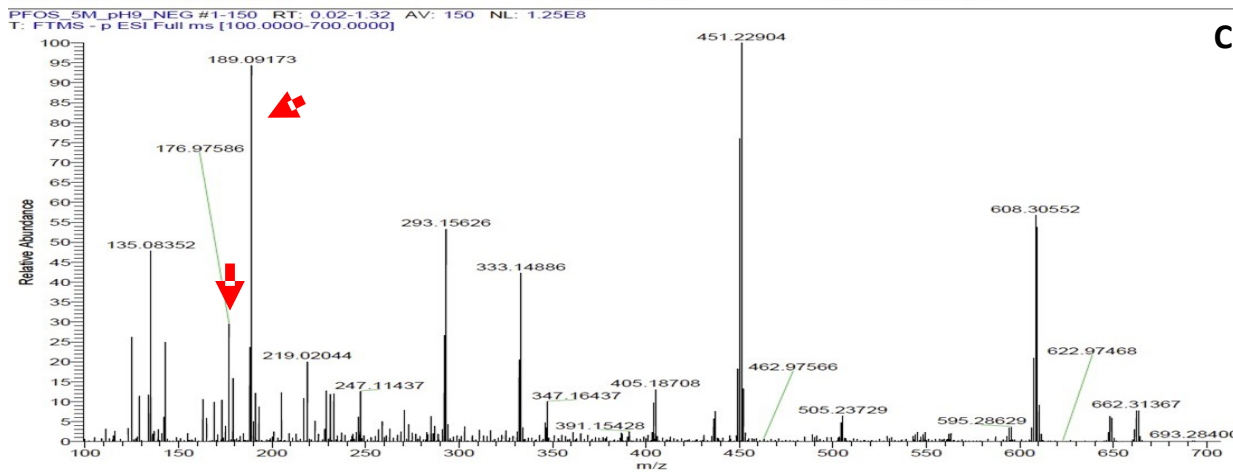

82

83

84

85 **Figure SF2.** Comparison between negative ion spectra of PFOS control (A), and PFOS reacted at  
 86 different conditions - 5M H<sub>2</sub>O<sub>2</sub> at pH7 (B), and 5M H<sub>2</sub>O<sub>2</sub> at pH9 (C). Arrows indicate peaks  
 87 corresponding to degradation products, asterisks indicate peaks reported in the literature.<sup>2</sup> Strong  
 88 peaks in spectrum C (at m/z 293, 333, 405, 451, 608) are attributed to metalloorganic cluster  
 89 anions, that are also observed in spectra of blank (non-PFOS-containing) samples at the same  
 90 experimental conditions.

91

### 92 S3.2. FLUORESCENCE PROBE MEASUREMENTS.

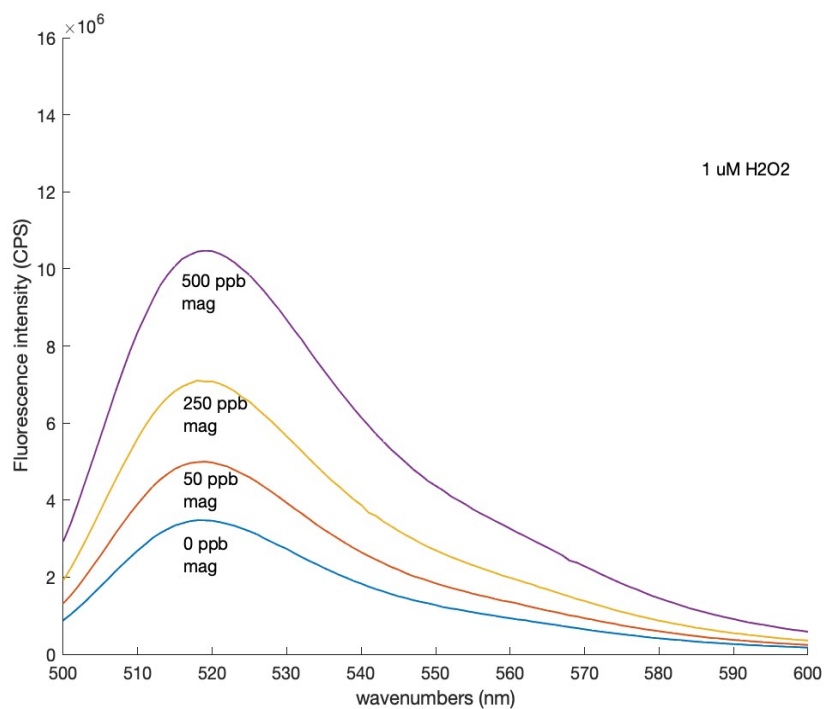

93

94 **Figure SF3.** Fluorescence intensity of detected ROS with increasing concentration of Fe<sub>3</sub>O<sub>4</sub>  
95 nanoparticles.

96

97

98

99

100

101

102

103

104

105

106

107

108

109

110

111

112

### 113 S3.3. MAGNETITE ADSORPTION CONTROLS

114

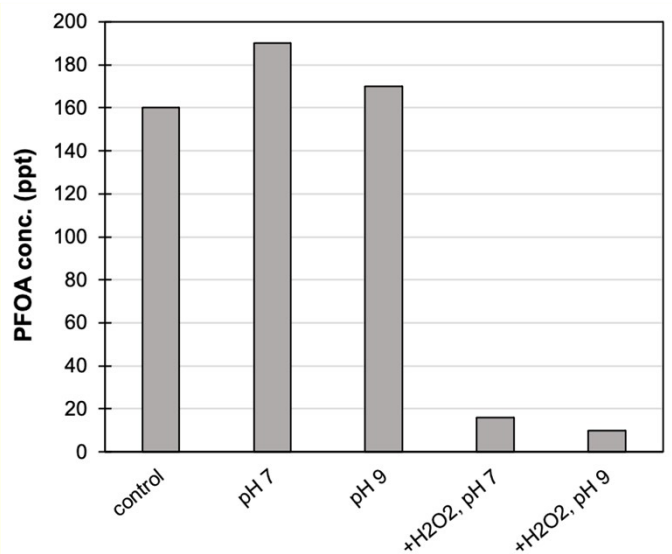

115

116 **Figure SF4.** PFOA concentrations in solutions with magnetite with and without added H<sub>2</sub>O<sub>2</sub> and  
117 exposed to UV radiation. There is no significant change in PFOA concentration with magnetite  
118 particles suspended in the solution, compared to the control. Therefore, adsorption to magnetite is  
119 not a contributing factor to PFAS removal. In contrast, ROS generated when H<sub>2</sub>O<sub>2</sub> is present in  
120 the solution result in a significant reduction in PFAS concentration.

121

122

### 123 S3.3. XANES.

124 All samples were prepared with 1000 ppm Fe<sub>3</sub>O<sub>4</sub> and underwent 30 min of UV-C exposure before

125 analysis. Linear combination fitting results for these spectra are given in Table ST4. Analysis

126 indicates no change in the peak energy of the K-edge (generally associated with oxidation state),

127 disappearance or appearance of pre-edge or K-edge features, or intensity of these features. In all

128 cases, the collected spectrum matches well with the Fe<sub>3</sub>O<sub>4</sub> standard spectrum collected and shown

129 in Figure SF3A. Further analysis by linear combination fitting (Table ST4) of 4 common Fe

130 mineral spectra containing varied oxidation states of Fe emphasizes there is no change in the Fe<sub>3</sub>O<sub>4</sub>

131 after multiple reaction cycles. All samples are shown to be between 94-100% (estimated fit error

132 ± 3%) Fe<sub>3</sub>O<sub>4</sub> in their Fe bonding characteristics. There is one outlier in the 2.55M, pH9 sample



133 after one cycle, which shows only about 89% Fe<sub>3</sub>O<sub>4</sub>, and this outlier is likely due to difficulty in  
134 normalizing this specific spectrum, which may cause the fit to have a larger error.

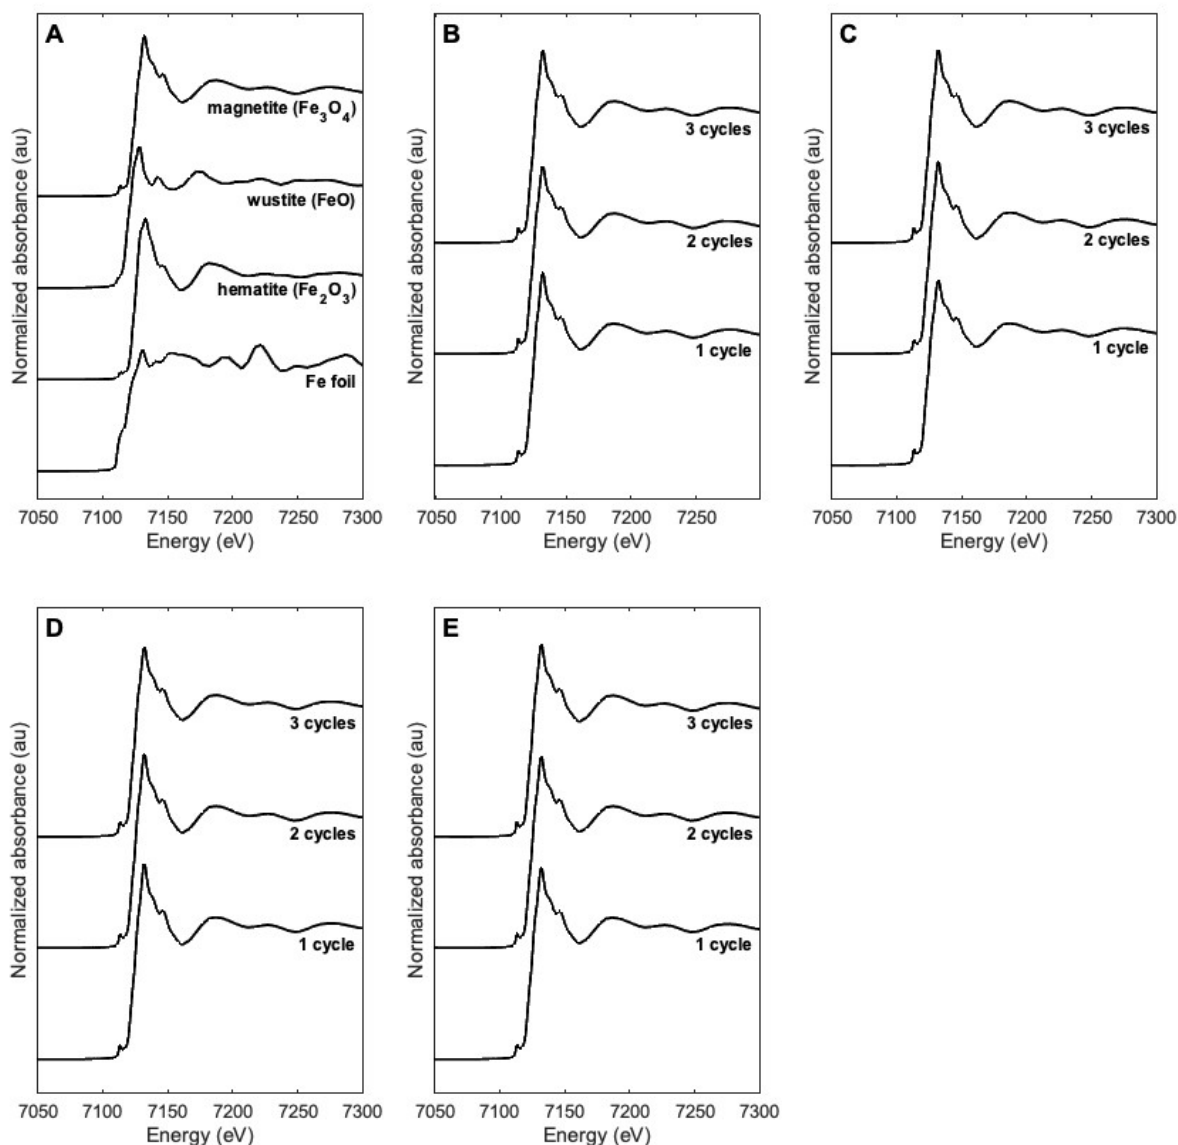

135

136 **Figure SF5.** Fe K-edge XANES spectra for Fe standards (A) and Fe<sub>3</sub>O<sub>4</sub> NPs after variable number  
137 of UV-Fenton cycles and solution conditions: (B) 2.55 M H<sub>2</sub>O<sub>2</sub>, pH 7, (C) 2.55 M H<sub>2</sub>O<sub>2</sub>, pH 9, (D)  
138 5 M H<sub>2</sub>O<sub>2</sub>, pH 7, (E) 5 M H<sub>2</sub>O<sub>2</sub>, pH 9.

139

140 **Table ST2.** Linear combination fitting of Fe K-edge XANES using four common Fe standards  
 141 with varied Fe speciation and local bonding states. The reported R-factor represents the goodness-  
 142 of-fit.

| <b>Samples</b>                              | <b>Fe foil</b> | <b>Fe<sub>2</sub>O<sub>3</sub></b> | <b>FeO</b> | <b>Fe<sub>3</sub>O<sub>4</sub></b> | <b>R-factor</b> |
|---------------------------------------------|----------------|------------------------------------|------------|------------------------------------|-----------------|
| 2.55 M H <sub>2</sub> O <sub>2</sub> , pH 7 |                |                                    |            |                                    |                 |
| 1 cycle                                     | 0.016          | 0                                  | 0.014      | 0.970                              | 0.000055        |
| 2 cycles                                    | 0.049          | 0                                  | 0.015      | 0.930                              | 0.000325        |
| 3 cycles                                    | 0.022          | 0                                  | 0.004      | 0.974                              | 0.000068        |
| 2.55 M H <sub>2</sub> O <sub>2</sub> , pH 9 |                |                                    |            |                                    |                 |
| 1 cycle                                     | 0.075          | 0                                  | 0.032      | 0.889                              | 0.000633        |
| 2 cycles                                    | 0.020          | 0                                  | 0.007      | 0.972                              | 0.000054        |
| 3 cycles                                    | 0.017          | 0                                  | 0.010      | 0.974                              | 0.000044        |
| 5 M H <sub>2</sub> O <sub>2</sub> , pH 7    |                |                                    |            |                                    |                 |
| 1 cycle                                     | 0.000          | 0                                  | 0.005      | 0.997                              | 0.000007        |
| 2 cycles                                    | 0.010          | 0                                  | 0.004      | 0.987                              | 0.000025        |
| 3 cycles                                    | 0.045          | 0                                  | 0.013      | 0.941                              | 0.000242        |
| 5 M H <sub>2</sub> O <sub>2</sub> , pH 9    |                |                                    |            |                                    |                 |
| 1 cycle                                     | 0.028          | 0                                  | 0.017      | 0.955                              | 0.000094        |
| 2 cycles                                    | 0.028          | 0                                  | 0.016      | 0.956                              | 0.000112        |
| 3 cycles                                    | 0.022          | 0                                  | 0.006      | 0.971                              | 0.000059        |

143

144

145

146 **Supplementary References**

- 147 (1) Trojanowicz, M.; Bobrowski, K.; Szostek, B.; Bojanowska-Czajka, A.; Szreder, T.;  
148 Bartoszewicz, I.; Kulisa, K. A Survey of Analytical Methods Employed for Monitoring of  
149 Advanced Oxidation/Reduction Processes for Decomposition of Selected Perfluorinated  
150 Environmental Pollutants. *Talanta* **2018**, *177* (September 2017), 122–141.  
151 <https://doi.org/10.1016/j.talanta.2017.09.002>.
- 152 (2) Yamamoto, T.; Noma, Y.; Sakai, S. I.; Shibata, Y. Photodegradation of Perfluorooctane  
153 Sulfonate by UV Irradiation in Water and Alkaline 2-Propanol. *Environ. Sci. Technol.*  
154 **2007**, *41* (16), 5660–5665. <https://doi.org/10.1021/es0706504>.
- 155
